# Supplementary material
Source: publisher figshare collection journal article supplement (https://sage.figshare.com/ndownloader/files/18615821)
Supplement: Supplementary file 1 [file 18615821]

## Appendix 1

### Fatalities and Causes in the UKCS since the Commencement of the Oil and Gas Industry<sup>1</sup>

| Date                            | Fatalities | Location             | Cause of accident                                                                                                 | Helicopter type        |
|---------------------------------|------------|----------------------|-------------------------------------------------------------------------------------------------------------------|------------------------|
| 21 <sup>st</sup> April 1976     | 1          | Forties Field        | Tail rotor malfunction                                                                                            | Sikorsky -58T          |
| 12 <sup>th</sup> March 1981     | 4          | St Fergus            | Main rotor blade separated due to a fatigue failure of the spindle                                                | Sikorsky -76A          |
| 12 <sup>th</sup> August 1981    | 1          | East Shetland Basin  | Lost power to the main rotor gearbox, going out of control during the ensuing autorotation                        | Bell 212               |
| 13 <sup>th</sup> August 1981    | 13         | Off Norfolk Coast    | Insufficient evidence to explain loss of power or control                                                         | Wessex                 |
| 14 <sup>th</sup> September 1982 | 6          | East Shetland Basin  | Insufficient evidence, although adverse weather and darkness were factors                                         | Bell 212               |
| 10 <sup>th</sup> October 1982   | 2          | Aberdeen Airport     | One engine suffered a failure of the gas generator turbine                                                        | SA330J (Puma)          |
| 21 <sup>st</sup> November 1984  | 2          | North East of Humber | Technical error                                                                                                   | Bell 212               |
| 6 <sup>th</sup> November 1986   | 45         | East of Sumburgh     | Forward transmission spiral bevel ring failed                                                                     | Chinook                |
| 25 <sup>th</sup> July 1990      | 6          | Brent Spar           | Pilot allowed helicopter tail rotor to contact handrail on approach to land                                       | Sikorsky S-61N         |
| 14 <sup>th</sup> March 1992     | 11         | Cormorant Alpha      | Pilot error on take off                                                                                           | AS332L Super Puma      |
| 16 <sup>th</sup> July 2002      | 11         | Off Norfolk Coast    | Loss of rotor head in flight                                                                                      | Sikorsky S-76A+        |
| 27 <sup>th</sup> December 2006  | 7          | Morecambe Bay        | Co-pilot loss of control due to bad weather                                                                       | Eurocopter AS365N      |
| 1 <sup>st</sup> April 2009      | 16         | Off Peterhead        | Mechanical failure                                                                                                | AS332L Super Puma Mk 2 |
| 23 <sup>rd</sup> August 2013    | 4          | Off Sumburgh         | Pilot error as the helicopter's flight instruments were not monitored effectively during the latter stages of the | AS332 Super Puma Mk 2  |

| Date                  | Fatalities | Location | Cause of accident                     | Helicopter type |
|-----------------------|------------|----------|---------------------------------------|-----------------|
|                       |            |          | non-precision<br>instrument approach. |                 |
| Helideck<br>Accidents | 3          |          |                                       |                 |
| <b>Total</b>          | <b>132</b> |          |                                       |                 |

## Reference:

<sup>1</sup> Oil and Gas UK. Reportable helicopter accidents, [https://oilandgasuk.co.uk/wp-content/uploads/2017/07/Appendix-1\\_Reportable-Helicopter-Accidents-2017.pdf](https://oilandgasuk.co.uk/wp-content/uploads/2017/07/Appendix-1_Reportable-Helicopter-Accidents-2017.pdf) (2017, accessed 19 September 2019)

## Appendix 2

### Impact of Restricting Operations to Certificated Helicopter Ditching Performance<sup>3</sup>

| Operating Area                                                 | Helicopter Ditching Performance (Sea State) |      |      |     |
|----------------------------------------------------------------|---------------------------------------------|------|------|-----|
|                                                                | 3                                           | 4    | 5    | 6   |
|                                                                | % Operations Lost                           |      |      |     |
| Average all areas                                              | 61.8                                        | 27.7 | 8.55 | 1.4 |
| Northern North Sea / West of Shetlands<br>(avg. routes A & B*) | 66.4                                        | 33.8 | 12.2 | 2.4 |
| Mid North Sea (avg. routes C & D*)                             | 55.0                                        | 19.8 | 4.3  | 0.4 |
| Southern North Sea (avg. routes E & F*)                        | 64.0                                        | 29.7 | 9.2  | 1.4 |

## Appendix 3

### Assessment of Helicopter Types in Offshore Helicopter Operations

The CAA in their review of industry safety in 2014 assessed helicopter types themselves where helicopters were ranked by specialist engineers in the following categories:<sup>3</sup> (p66)

1. Types which are currently in service and which potentially have a long life, large or growing fleets, providing support for offshore operations.
2. Types which are in service which have potentially reducing fleets providing support for offshore operations.
3. Types which have or may be phased out or have smaller fleet numbers providing support for offshore operations.
4. Types which only currently operate in the Search and Rescue role or have been phased out.

<sup>3</sup> (p66)

### Helicopter Age in Offshore Helicopter Operations<sup>3</sup> (p66)

|   | Type                       | Rank | Entry into operations | UK Fleet size inc SAR (Nov 13) |
|---|----------------------------|------|-----------------------|--------------------------------|
| a | AgustaWestland AW139       | 1    | 2005                  | 16                             |
| b | Eurocopter EC225 LP        | 1    | 2005                  | 22                             |
| c | Sikorsky S-92              | 1    | 2005                  | 26                             |
| d | Eurocopter AS332 L2        | 2    | 1998                  | 6                              |
| e | Eurocopter SA365 C<br>(N3) | 2    | 1979<br>(2009)        | 0<br>(3 )                      |
| f | Sikorsky S-76 C++          | 2    | 2006                  | 6                              |
| g | Eurocopter AS332 L & L1    | 3    | 1982                  | 13                             |
| h | Sikorsky S-76 A ++         | 3    | 1980                  | 0                              |
| i | Eurocopter EC155           | 3    | 2007                  | 1                              |
| j | Sikorsky S-61              | 4    | Pre-1975              | 2                              |
